# Supplementary material for: Foliar endophyte diversity in Eastern Asian-Eastern North American disjunct tree species – influences of host identity, environment, phylogeny, and geographic isolation
Source: Front Plant Sci. 2023 Dec 13;14:1274746. doi: 10.3389/fpls.2023.1274746 (PMC10773735; doi:10.3389/fpls.2023.1274746)
Supplement: Supplementary file 2 [file Table_1.xlsx]

## Sheet: Sheet1
Table S1. All collected samples in this study. The table includes three comparison categories. Red color represents the species from eastern Asia, while blue color represents the species from eastern North America. A question marker means the number of total disjunct pairs is uncertian because of uncertain phylogenetic topologies based on the references. The samples in yellow marks are removed af…
Genus (No. of disjunct sp. analyzed/No. of sp. in the disjunct clade)	Molecular data used for phylogeny	Native region	Species names	Voucher info	ITS/16S accesion
Acer (2/2?)	plastome (MN864497)	EA-Japan	Acer carpinifolium	Arnold Arboretum, MA, USA, acc. #354-95*B	M1
		EA-Japan	Acer carpinifolium	Arnold Arboretum, MA, USA, acc. #10959*B	M2
		EA-Japan	Acer carpinifolium	Arnold Arboretum, MA, USA, acc. #10648*A	M3
	rpl16 (AF459468); trnD-trnT (DQ659819); rbcL (MK525114); psbM-trnD (DQ659879); matK (MK509367)	ENA	Acer spicatum	Arnold Arboretum, MA, USA, acc. #270-2010*A	M4
		ENA	Acer spicatum	Arnold Arboretum, MA, USA, acc. #600-2008*A	M5
		ENA	Acer spicatum	Arnold Arboretum, MA, USA, acc. #603-2008*A	M6
Calycanthus (2/2)	plastome (NC_037504)	EA-China	Calycanthus chinensis	Arnold Arboretum, MA, USA, acc. #607-94*C	M7
		EA-China	Calycanthus chinensis	Arnold Arboretum, MA, USA, acc. #785-94*B	M8
		EA-China	Calycanthus chinensis	Arnold Arboretum, MA, USA, acc. #785-94*D	M9
	plastome (NC_004993)	ENA	Calycanthus floridus	Arnold Arboretum, MA, USA, acc. #866-81*MASS	M10
		ENA	Calycanthus floridus	Arnold Arboretum, MA, USA, acc. #934-79*MASS	M11
		ENA	Calycanthus floridus	Arnold Arboretum, MA, USA, acc. #102-2007*A	M12
Campsis (2/2)	matK (GQ434140); rbcL (AF190429)	EA-China	Campsis grandiflora	Arnold Arboretum, MA, USA, acc. #1231-79*B	M156
		EA-China	Campsis grandiflora	Arnold Arboretum, MA, USA, acc. #1231-79*D	M154
		EA-China	Campsis grandiflora	Arnold Arboretum, MA, USA, acc. #810-94*MASS	M155
	trnL (FN794050); matK (AF531775); rps16 (FN794085); rbcL (AF156737); ndhF (AF130144)	ENA	Campsis radicans	Arnold Arboretum, MA, USA, acc. #206-91*A	M157
		ENA	Campsis radicans	Arnold Arboretum, MA, USA, acc. #626-91*MASS	M158
		ENA	Campsis radicans 'Flava'	Arnold Arboretum, MA, USA, acc. #351-2006*A	M159
Castanea (2/6)	plastome (NC_014674)	EA	Castanea mollissima	Arnold Arboretum, MA, USA, acc. #269-2011*A	M16
		EA	Castanea mollissima	Arnold Arboretum, MA, USA, acc. #7892*A	M17
		EA	Castanea mollissima	Arnold Arboretum, MA, USA, acc. #205-92*A	M18
	partial plastome (C_247) Zhou et al., 2021	ENA	Castanea dentata	Arnold Arboretum, MA, USA, acc. #24-80*A	M13
		ENA	Castanea dentata	Arnold Arboretum, MA, USA, acc. #461-51*D	M14
		ENA	Castanea dentata	Arnold Arboretum, MA, USA, acc. #304-96*A	M15
Decumaria (2/?)	plastome (NC_044833)	EA	Decumaria sinensis	Arnold Arboretum, MA, USA, acc. #263-2006*B	M166
		EA	Decumaria sinensis	Arnold Arboretum, MA, USA, acc. #263-2006*A	M165
	plastome (NC_044832)	ENA	Decumaria barbara	Arnold Arboretum, MA, USA, acc. #579-2003*C	M164
		ENA	Decumaria barbara	Arnold Arboretum, MA, USA, acc. #579-2003*B	M163
Gleditsia (2/9)	plastome (NC_047281)	EA	Gleditsia japonica	Arnold Arboretum, MA, USA, acc. #291-94*B	M32
		EA	Gleditsia japonica	Arnold Arboretum, MA, USA, acc. #209-79*B	M33
		EA	Gleditsia japonica	Arnold Arboretum, MA, USA, acc. #209-79*A	M34
	rtnL (AY232783); rpl16 (AF040734); rbcL (KJ773539); ndhF (AF020472); matK (KJ772815)	ENA	Gleditsia aquatica	Arnold Arboretum, MA, USA, acc. #201-93*B	M29
		ENA	Gleditsia aquatica	Arnold Arboretum, MA, USA, acc. #201-93*G	M30
		ENA	Gleditsia aquatica	Arnold Arboretum, MA, USA, acc. #201-93*E	M31
Halesia (3)	plastome (NC_041136)	EA	Halesia macgregorii	Arnold Arboretum, MA, USA, acc. #307-2004*A	M173
	ndhF (AF130214); rbcL (MF349602)	ENA	Halesia tetraptera	Arnold Arboretum, MA, USA, acc. #250-36*A	M175
		ENA	Halesia tetraptera	Arnold Arboretum, MA, USA, acc. #959-37*A	M176
		ENA	Halesia tetraptera	Arnold Arboretum, MA, USA, acc. #19630*A	M174
	plastome (NC_041128)	ENA	Halesia diptera	Arnold Arboretum, MA, USA, acc. #81-89*D	M170
		ENA	Halesia diptera	Arnold Arboretum, MA, USA, acc. #81-89*C	M172
		ENA	Halesia diptera	Arnold Arboretum, MA, USA, acc. #389-96*B	M171
Hamamelis (5/6)	partial plastome (H_293) Zhou et al., 2021	EA-Japan	Hamamelis japonica	Arnold Arboretum, MA, USA, acc. #475-90*A	M35
		EA-Japan	Hamamelis japonica forma flavopurpurascens	Arnold Arboretum, MA, USA, acc. #621-79*A	M36
		EA-Japan	Hamamelis japonica forma flavopurpurascens	Arnold Arboretum, MA, USA, acc. #10161*A	M37
	plastome (NC_037881)	EA-China	Hamamelis mollis	Arnold Arboretum, MA, USA, acc. #698-94*A	M38
		EA-China	Hamamelis mollis	Arnold Arboretum, MA, USA, acc. #697-94*A	M39
		EA-China	Hamamelis mollis	Arnold Arboretum, MA, USA, acc. #5281*A	M40
	partial plastome (H_259) Zhou et al., 2021	ENA	Hamamelis ovalis	Arnold Arboretum, MA, USA, acc. #115-2009*A	M41
		ENA	Hamamelis ovalis	Arnold Arboretum, MA, USA, acc. #113-2009*A	M42
	partial plastome (H_262) Zhou et al., 2021	ENA	Hamamelis vernalis	Arnold Arboretum, MA, USA, acc. #6099*A	M43
		ENA	Hamamelis vernalis	Arnold Arboretum, MA, USA, acc. #336-89*A	M45
	partial plastome (H_359) Zhou et al., 2021	ENA	Hamamelis virginiana	Arnold Arboretum, MA, USA, acc. #526-2009*A	M46
		ENA	Hamamelis virginiana	Arnold Arboretum, MA, USA, acc. #14693*D	M47
		ENA	Hamamelis virginiana	Arnold Arboretum, MA, USA, acc. #18314*A	M48
Magnolia (2/4)	plastome (NC_020316)	EA-China	Magnolia officinalis	Arnold Arboretum, MA, USA, acc. #158-96*A	M177
		EA-China	Magnolia officinalis var. biloba	Arnold Arboretum, MA, USA, acc. #398-81*F	M179
		EA-China	Magnolia officinalis var. biloba	Arnold Arboretum, MA, USA, acc. #160-96*A	M178
	plastome (NC_024027)	ENA	Magnolia tripetala	Arnold Arboretum, MA, USA, acc. #766-58*A	M66
		ENA	Magnolia tripetala	Arnold Arboretum, MA, USA, acc. #426-76*A	M67
		ENA	Magnolia tripetala	Arnold Arboretum, MA, USA, acc. #561-2009*A	M68
Menispermum (2/2)	plastome (NC_042371)	EA	Menispermum dauricum	Arnold Arboretum, MA, USA, acc. #548-94*A	M184
	plastome (NC_048451)	ENA	Menispermum canadense	Arnold Arboretum, MA, USA, acc. #283-2017*A	M181
		ENA	Menispermum canadense	Arnold Arboretum, MA, USA, acc. #345-2017*A	M183
		ENA	Menispermum canadense	Arnold Arboretum, MA, USA, acc. #283-2017*C	M182
Torreya (2/7)	plastome (MK978775)	EA	Torreya nucifera	Arnold Arboretum, MA, USA, acc. #454-90*B	M89
		EA	Torreya nucifera	Arnold Arboretum, MA, USA, acc. #454-90*A	M90
		EA	Torreya nucifera var. igaensis	Arnold Arboretum, MA, USA, acc. #453-90*A	M91
	plastome (MK249063)	ENA	Torreya taxifolia	Arnold Arboretum, MA, USA, acc. #857-87*A	M92
		ENA	Torreya taxifolia	Arnold Arboretum, MA, USA, acc. #818-87*B	M93
		ENA	Torreya taxifolia	Arnold Arboretum, MA, USA, acc. #1054-89*I	M94
Lindera (2/2)	plastome (NC_045262)	EA-China	Lindera obtusiloba	Arnold Arboretum, MA, USA, acc. #1626-77*A	M52
		EA-China	Lindera obtusiloba	Arnold Arboretum, MA, USA, acc. #376-86*A	M53
		EA-China	Lindera obtusiloba	Arnold Arboretum, MA, USA, acc. #1619-82*A	M54
	matK (MG220997); trnL (KF586693); rbcL (MG248911)	ENA	Lindera benzion	Arnold Arboretum, MA, USA, acc. #248-2013*A	M49
		ENA	Lindera benzoin	Arnold Arboretum, MA, USA, acc. #701-93*A	M50
		ENA	Lindera benzoin	Arnold Arboretum, MA, USA, acc. #244-2013*D	M51
Liriodendron (2/2)	plastome (NC_030504)	EA-China	Liriodendron chinense	Arnold Arboretum, MA, USA, acc. #451-80*D	M60
		EA-China	Liriodendron chinense	Arnold Arboretum, MA, USA, acc. #265-79*A	M61
		EA-China	Liriodendron chinense	Arnold Arboretum, MA, USA, acc. #234-2004*A	M62
	plastome (NC_008326)	ENA	Liriodendron tulipifera	Arnold Arboretum, MA, USA, acc. #14992*A	M63
		ENA	Liriodendron tulipifera	Arnold Arboretum, MA, USA, acc. #773-81*A	M64
		ENA	Liriodendron tulipifera	Arnold Arboretum, MA, USA, acc. #1038-80*A	M65
Pieris (2/4)	matK (AB206598); trnS-trnfM (AB206601); trnL (AB206631); rbcL (AB206589); psbC-trnS (AB206611)	EA	Pieris japonica	Arnold Arboretum, MA, USA, acc. #281-74*MASS	M73
		EA	Pieris japonica	Arnold Arboretum, MA, USA, acc. #1440-63*A	M74
		EA	Pieris japonica	Arnold Arboretum, MA, USA, acc. #1441-63*A	M75
	matK (U61304); trnS-trnfM (AB206609); trnL (AB206639); rbcL (AF124577); psbC-trnS (AB206619)	ENA	Pieris floribunda	Arnold Arboretum, MA, USA, acc. #311-74*C	M261
		ENA	Pieris floribunda	Arnold Arboretum, MA, USA, acc. #14921*B	M262
		ENA	Pieris floribunda	Arnold Arboretum, MA, USA, acc. #14919*A	M263
Sassafras (2/3)	plastome (NC_045268)	EA-China	Sassafras tzumu	Arnold Arboretum, MA, USA, acc. #144-2015*A	M180
	atpB (AF209668); rps4 (AY188236); rpoC1 (EU154057); rpl16 (AF268242); rbcL (AF206819); matK (MK898784)	ENA	Sassafras albidum	Arnold Arboretum, MA, USA, acc. #22915*A	M264
		ENA	Sassafras albidum	Arnold Arboretum, MA, USA, acc. #968*A	M265
		ENA	Sassafras albidum	Arnold Arboretum, MA, USA, acc. #22801*A	M266
Cornus (2/2)	plastome (NC_030260)	EA-China	Cornus controversa	Arnold Arboretum, MA, USA, acc. #961-67*A	M197
		EA-China	Cornus controversa	Arnold Arboretum, MA, USA, acc. #241-2011*A	M198
	plastome (NC_044812)	ENA	Cornus alternifolia	Arnold Arboretum, MA, USA, acc. #612-2007*D	M160
		ENA	Cornus alternifolia	Arnold Arboretum, MA, USA, acc. #612-2007*A	M162
		ENA	Cornus alternifolia	Arnold Arboretum, MA, USA, acc. #233-2013*A	M161
Nyssa (2/3)	plastome (KX904873)	EA	Nyssa sinensis	Arnold Arboretum, MA, USA, acc. #374-81*B	M69
	atpB (AJ235545); rps16 (MK608859); rpl32 (EU734510); rbcL (AF119178); ndhF (JF321072); matK (MK608992)	ENA	Nyssa sylvatica	Arnold Arboretum, MA, USA, acc. #966-79*A	M70
		ENA	Nyssa sylvatica	Arnold Arboretum, MA, USA, acc. #654-2008*A	M71
		ENA	Nyssa sylvatica	Arnold Arboretum, MA, USA, acc. #982-79*A	M72
Cornus (No. of replicates)	Molecular data used for phylogeny	Cornus group	Species names	Voucher info
Cornus alternifolia (3)	Thomas et al. #128	Swida/BW (19)	Cornus alternifolia	Arnold Arboretum, MA, USA, acc. #612-2007*D	M160
			Cornus alternifolia	Arnold Arboretum, MA, USA, acc. #612-2007*A	M162
			Cornus alternifolia	Arnold Arboretum, MA, USA, acc. #233-2013*A	M161
Cornus alba (2)	Thomas et al. #127		Cornus alba 'Alleman's Compact'	Arnold Arboretum, MA, USA, acc. #344-2002*B	M189
			Cornus alba 'Bud's Yellow'	Arnold Arboretum, MA, USA, acc. #345-2002*A	M190
Cornus amomum (3)	Thomas et al. #25		Cornus amomum	Arnold Arboretum, MA, USA, acc. #21402*MASS	M191
			Cornus amomum	Arnold Arboretum, MA, USA, acc. #349-2009*A	M192
			Cornus amomum	Arnold Arboretum, MA, USA, acc. #113-85*MASS	M193
Cornus australis (1)	None		Cornus australis	Arnold Arboretum, MA, USA, acc. #41-2002*B	M194
Cornus bretschneideri (2)	None		Cornus bretschneideri	Arnold Arboretum, MA, USA, acc. #141-2005*A	M195
			Cornus bretschneideri	Arnold Arboretum, MA, USA, acc. #149-2007*A	M196
Cornus controversa (2)	Thomas et al. #130		Cornus controversa	Arnold Arboretum, MA, USA, acc. #961-67*A	M197
			Cornus controversa	Arnold Arboretum, MA, USA, acc. #241-2011*A	M198
Cornus coreana (2)	None		Cornus coreana	Arnold Arboretum, MA, USA, acc. #706-80*A	M199
			Cornus coreana	Arnold Arboretum, MA, USA, acc. #706-80*B	M200
Cornus drummondii (3)	Thomas et al. #131		Cornus drummondii	Arnold Arboretum, MA, USA, acc. #802-49*B	M201
			Cornus drummondii	Arnold Arboretum, MA, USA, acc. #1031-80*MASS	M202
			Cornus drummondii	Arnold Arboretum, MA, USA, acc. #1717-81*A	M203
Cornus foemina (2)	Thomas et al. #29		Cornus foemina	Arnold Arboretum, MA, USA, acc. #15-55*A	M207
			Cornus foemina	Arnold Arboretum, MA, USA, acc. #15-55*B	M208
Cornus glabrata (2)	Thomas et al. #C28		Cornus glabrata	Arnold Arboretum, MA, USA, acc. #1260-66*B	M209
			Cornus glabrata	Arnold Arboretum, MA, USA, acc. #1260-66*C	M210
Cornus hemsleyi (3)	Thomas et al. #133		Cornus hemsleyi	Arnold Arboretum, MA, USA, acc. #667-76*MASS	M211
			Cornus hemsleyi	Arnold Arboretum, MA, USA, acc. #92-81*D	M212
			Cornus hemsleyi	Arnold Arboretum, MA, USA, acc. #92-81*E	M213
Cornus macrophylla (2)	Thomas et al. #134		Cornus macrophylla	Arnold Arboretum, MA, USA, acc. #422-94*A	M217
			Cornus macrophylla	Arnold Arboretum, MA, USA, acc. #422-94*B	M218
Cornus obliqua (3)	Thomas et al. #125		Cornus obliqua	Arnold Arboretum, MA, USA, acc. #110-79*A	M222
			Cornus obliqua	Arnold Arboretum, MA, USA, acc. #110-79*B	M223
			Cornus obliqua	Arnold Arboretum, MA, USA, acc. #1467-83*A	M224
Cornus pumila (2)	None		Cornus pumila	Arnold Arboretum, MA, USA, acc. #222-76*B	M228
			Cornus pumila	Arnold Arboretum, MA, USA, acc. #228-2000*A	M229
Cornus quinquenervis (1)	None		Cornus quinquenervis	Arnold Arboretum, MA, USA, acc. #1235-70*A	M230
Cornus racemosa (3)	Thomas et al. #42		Cornus racemosa	Arnold Arboretum, MA, USA, acc. #599*A	M231
			Cornus racemosa	Arnold Arboretum, MA, USA, acc. #613-74*C	M232
			Cornus racemosa	Arnold Arboretum, MA, USA, acc. #1782-77*A	M233
Cornus sanguinea (3)	Thomas et al. #139		Cornus sanguinea	Arnold Arboretum, MA, USA, acc. #137-2002*B	M234
			Cornus sanguinea	Arnold Arboretum, MA, USA, acc. #136-2002*B	M235
			Cornus sanguinea 'Wisley Form'	Arnold Arboretum, MA, USA, acc. #310-78*MASS	M236
Cornus sericea (3)	Thomas et al. #144		Cornus sericea	Arnold Arboretum, MA, USA, acc. #769-93*B	M237
			Cornus sericea	Arnold Arboretum, MA, USA, acc. #21028*A	M238
			Cornus sericea	Arnold Arboretum, MA, USA, acc. #21079*A	M239
Cornus walteri (3)	Thomas et al. #146		Cornus walteri	Arnold Arboretum, MA, USA, acc. #1318-71*A	M240
			Cornus walteri	Arnold Arboretum, MA, USA, acc. #1471-77*A	M241
			Cornus walteri	Arnold Arboretum, MA, USA, acc. #435-80*B	M242
Cornus mas (3)	Thomas et al. #C16	Macrocarpium/CC (2)	Cornus mas	Arnold Arboretum, MA, USA, acc. #13126*A	M219
			Cornus mas	Arnold Arboretum, MA, USA, acc. #809-83*C	M220
			Cornus mas	Arnold Arboretum, MA, USA, acc. #645-79*A	M221
Cornus officinalis (3)	Thomas et al. #53		Cornus officinalis	Arnold Arboretum, MA, USA, acc. #8156*A	M225
			Cornus officinalis	Arnold Arboretum, MA, USA, acc. #8153-1*A	M226
			Cornus officinalis	Arnold Arboretum, MA, USA, acc. #918-85*A	M227
Cornus florida (3)	Thomas et al. #110	Benthamidia/BB (2)	Cornus florida	Arnold Arboretum, MA, USA, acc. #811-2008*A	M204
			Cornus florida	Arnold Arboretum, MA, USA, acc. #816-2008*A	M205
			Cornus florida	Arnold Arboretum, MA, USA, acc. #669-2010*A	M206
Cornus kousa (3)	Thomas et al. #120		Cornus kousa	Arnold Arboretum, MA, USA, acc. #524-49*B	M214
			Cornus kousa	Arnold Arboretum, MA, USA, acc. #524-49*C	M215
			Cornus kousa	Arnold Arboretum, MA, USA, acc. #13123*A	M216
Sampling locations (No. of replicates)		Sampling location	Species names	Voucher info
Calycanthus chinensis (3)	Not applied	Bostan	Calycanthus chinensis	Arnold Arboretum, MA, USA, acc. #607-94*C	M7
	Not applied	Bostan	Calycanthus chinensis	Arnold Arboretum, MA, USA, acc. #785-94*B	M8
	Not applied	Bostan	Calycanthus chinensis	Arnold Arboretum, MA, USA, acc. #785-94*D	M9
Calycanthus chinensis (2)	Not applied	NC	Calycanthus chinensis	JC Arboretum, NC, USA, acc. #xx0487	M95
	Not applied	NC	Calycanthus chinensis	JC Arboretum, NC, USA, acc. #xx0488	M96
Calycanthus floridus (3)	Not applied	Bostan	Calycanthus floridus	Arnold Arboretum, MA, USA, acc. #866-81*MASS	M10
	Not applied	Bostan	Calycanthus floridus	Arnold Arboretum, MA, USA, acc. #934-79*MASS	M11
	Not applied	Bostan	Calycanthus floridus	Arnold Arboretum, MA, USA, acc. #102-2007*A	M12
Calycanthus floridus (2)	Not applied	NC	Calycanthus floridus 'Athens'	JC Arboretum, NC, USA, acc. #10880	M97
	Not applied	NC	Calycanthus floridus 'Michael Lindsay'	JC Arboretum, NC, USA, acc. #30165	M98
Campsis radicans (3)	Not applied	Bostan	Campsis radicans	Arnold Arboretum, MA, USA, acc. #206-91*A	M157
	Not applied	Bostan	Campsis radicans	Arnold Arboretum, MA, USA, acc. #626-91*MASS	M158
	Not applied	Bostan	Campsis radicans 'Flava'	Arnold Arboretum, MA, USA, acc. #351-2006*A	M159
Campsis radicans (3)	Not applied	NC	Campsis radicans	JC Arboretum, NC, USA, acc. #031744	M187
	Not applied	NC	Campsis radicans	JC Arboretum, NC, USA, acc. #030401	M185
	Not applied	NC	Campsis radicans	JC Arboretum, NC, USA, acc. #001220	M188
Gleditsia japonica (3)	Not applied	Bostan	Gleditsia japonica	Arnold Arboretum, MA, USA, acc. #291-94*B	M32
	Not applied	Bostan	Gleditsia japonica	Arnold Arboretum, MA, USA, acc. #209-79*B	M33
	Not applied	Bostan	Gleditsia japonica	Arnold Arboretum, MA, USA, acc. #209-79*A	M34
Gleditsia japonica (1)	Not applied	NC	Gleditsia japonica var. koraiensis	JC Arboretum, NC, USA, acc. #xx0612	M102
Halesia diptera (3)	Not applied	Bostan	Halesia diptera	Arnold Arboretum, MA, USA, acc. #81-89*D	M170
	Not applied	Bostan	Halesia diptera	Arnold Arboretum, MA, USA, acc. #81-89*C	M172
	Not applied	Bostan	Halesia diptera	Arnold Arboretum, MA, USA, acc. #389-96*B	M171
Halesia diptera (3)	Not applied	NC	Halesia diptera	JC Arboretum, NC, USA, acc. #170514	M168
	Not applied	NC	Halesia diptera var. magniflora	JC Arboretum, NC, USA, acc. #20987	M169
	Not applied	NC	Halesia diptera	JC Arboretum, NC, USA, acc. #920697	M186
Hamamelis mollis (3)	Not applied	Bostan	Hamamelis mollis	Arnold Arboretum, MA, USA, acc. #698-94*A	M38
	Not applied	Bostan	Hamamelis mollis	Arnold Arboretum, MA, USA, acc. #697-94*A	M39
	Not applied	Bostan	Hamamelis mollis	Arnold Arboretum, MA, USA, acc. #5281*A	M40
Hamamelis mollis (1)	Not applied	NC	Hamamelis mollis	JC Arboretum, NC, USA, acc. #010838	M104
Hamamelis vernalis (2)	Not applied	Bostan	Hamamelis vernalis	Arnold Arboretum, MA, USA, acc. #6099*A	M43
	Not applied	Bostan	Hamamelis vernalis	Arnold Arboretum, MA, USA, acc. #336-89*A	M45
Hamamelis vernalis (1)	Not applied	NC	Hamamelis vernalis	JC Arboretum, NC, USA, acc. # xx0241	M105
Hamamelis virginiana (3)	Not applied	Bostan	Hamamelis virginiana	Arnold Arboretum, MA, USA, acc. #526-2009*A	M46
	Not applied	Bostan	Hamamelis virginiana	Arnold Arboretum, MA, USA, acc. #14693*D	M47
	Not applied	Bostan	Hamamelis virginiana	Arnold Arboretum, MA, USA, acc. #18314*A	M48
Hamamelis virginiana (2)	Not applied	NC	Hamamelis virginiana var. henryi	JC Arboretum, NC, USA, acc. #xx0244	M107
	Not applied	NC	Hamamelis virginiana var. mexciana	JC Arboretum, NC, USA, acc. #20921	M108
Liriodendron chinense (3)	Not applied	Bostan	Liriodendron chinense	Arnold Arboretum, MA, USA, acc. #451-80*D	M60
	Not applied	Bostan	Liriodendron chinense	Arnold Arboretum, MA, USA, acc. #265-79*A	M61
	Not applied	Bostan	Liriodendron chinense	Arnold Arboretum, MA, USA, acc. #234-2004*A	M62
Liriodendron chinense (2)	Not applied	NC	Liriodendron chinense	JC Arboretum, NC, USA, acc. #880440	M117
	Not applied	NC	Liriodendron chinense	Duke Garden, NC, USA, acc. #Duke08	M118
Liriodendron chinense (3)	Not applied	China	Liriodendron chinense	Zhongshan Botanical Garden, Nanjing, China, Xiang #EZQ1	M255
	Not applied	China	Liriodendron chinense	Zhongshan Botanical Garden, Nanjing, China, Xiang #EZQ2	M256
	Not applied	China	Liriodendron chinense	Zhongshan Botanical Garden, Nanjing, China, Xiang #EZQ3	M257
Liriodendron tulipifera (3)	Not applied	Bostan	Liriodendron tulipifera	Arnold Arboretum, MA, USA, acc. #14992*A	M63
	Not applied	Bostan	Liriodendron tulipifera	Arnold Arboretum, MA, USA, acc. #773-81*A	M64
	Not applied	Bostan	Liriodendron tulipifera	Arnold Arboretum, MA, USA, acc. #1038-80*A	M65
Liriodendron tulptifera (1)	Not applied	NC	Liriodendron tulptifera	Duke Garden, NC, USA, acc. #Duke09	M120
Liriodendron tulipifera (3)	Not applied	China	Liriodendron tulipifera	Zhongshan Botanical Garden, Nanjing, China, Xiang #BMEZQ1	M258
	Not applied	China	Liriodendron tulipifera	Zhongshan Botanical Garden, Nanjing, China, Xiang #BMEZQ2	M259
	Not applied	China	Liriodendron tulipifera	Zhongshan Botanical Garden, Nanjing, China, Xiang #BMEZQ3	M260
Sassafras tzumu (1)	Not applied	Bostan	Sassafras tzumu	Arnold Arboretum, MA, USA, acc. #144-2015*A	M180
Sassafras tzumu (2)	Not applied	NC	Sassafras tzumu	JC Arboretum, NC, USA, acc. #20919	M123
	Not applied	NC	Sassafras tzumu	Duke Garden, NC, USA, acc. #Duke06	M124
Sassafras albidum (3)	Not applied	Bostan	Sassafras albidum	Arnold Arboretum, MA, USA, acc. #22915*A	M264
	Not applied	Bostan	Sassafras albidum	Arnold Arboretum, MA, USA, acc. #968*A	M265
	Not applied	Bostan	Sassafras albidum	Arnold Arboretum, MA, USA, acc. #22801*A	M266
Sassafras albidum (1)	Not applied	NC	Sassafras albidum	Duke Garden, NC, USA, acc. #Duke05	M122
Cornus controversa (2)	Not applied	Bostan	Cornus controversa	Arnold Arboretum, MA, USA, acc. #961-67*A	M197
	Not applied	Bostan	Cornus controversa	Arnold Arboretum, MA, USA, acc. #241-2011*A	M198
Cornus controversa (3)	Not applied	China	Cornus controversa	Tianmushan, Zhejiang, China, Xiang #18-04	M252
	Not applied	China	Cornus controversa	Tianmushan, Zhejiang, China, Xiang #18-06	M253
	Not applied	China	Cornus controversa	Tianmushan, Zhejiang, China, Xiang #18-13	M254
Cornus walteri (3)	Not applied	Bostan	Cornus walteri	Arnold Arboretum, MA, USA, acc. #1318-71*A	M240
	Not applied	Bostan	Cornus walteri	Arnold Arboretum, MA, USA, acc. #1471-77*A	M241
	Not applied	Bostan	Cornus walteri	Arnold Arboretum, MA, USA, acc. #435-80*B	M242
Cornus walteri (2)	Not applied	China	Cornus walteri	Jiangsu Botanical Garden, Jiangsu, China, Xiang # 18-52	M250
	Not applied	China	Cornus walteri	Jiangsu Botanical Garden, Jiangsu, China, Xiang # 18-53	M251
