# Supplementary material for: Foliar endophyte diversity in Eastern Asian-Eastern North American disjunct tree species – influences of host identity, environment, phylogeny, and geographic isolation
Source: Front Plant Sci. 2023 Dec 13;14:1274746. doi: 10.3389/fpls.2023.1274746 (PMC10773735; doi:10.3389/fpls.2023.1274746)
Supplement: Supplementary file 3 [file Table_2.xlsx]

## Sheet: Sheet1
Table S2 Alpha diverity merics of endophytes of species of Disjunct pairs, Cornus L., and different sampling locations, including the mean of Observed ASV and Shannon index
Disjunct pairs			Fungal endophytes		Bacterial endophytes
	Species name	Region	Observed ASVs	Shannon	Observed ASVs	Shannon
	Acer carpinifolium	EA	157	3.68817	4	1.16012
	Calycanthus chinensis	EA	121	3.3828	0	0
	Campsis grandiflora	EA	122	3.26387	1	0.228987
	Castanea mollissima	EA	102	3.52044	1	0.224337
	Cornus controversa	EA	185	4.31365	23	2.32573
	Decumaria sinensis	EA	106	3.39433	2	0.346344
	Gleditsia japonica	EA	101	3.15142	9	1.47443
	Halesia macgregorii	EA	61	2.10701	0	0
	Hamamelis japonica	EA	153	3.27779	10	1.60876
	Hamamelis mollis	EA	115	3.18588	7	1.48185
	Lindera obtusiloba	EA	133	3.58721	1	0
	Liriodendron chinense	EA	108	3.0291	0	0
	Magnolia officinalis	EA	104	2.63755	3	0.647781
	Menispermum dauricum	EA	18	0.0868415	0	0
	Nyssa sinensis	EA	56	2.97638	2	0.562335
	Pieris japonica	EA	155	3.58654	20	2.1958
	Sassafras tzumu	EA	123	3.61056	0	0
	Torreya nucifera	EA	182	3.93633	34	2.54831
	Acer spicatum	ENA	183	3.87625	23	2.33099
	Calycanthus floridus	ENA	139	3.22001	1	0.193305
	Campsis radicans	ENA	35	2.40754	0	0
	Castanea dentata	ENA	102	3.33447	2	0.400116
	Cornus alternifolia	ENA	126	3.28435	11	1.71055
	Decumaria barbara	ENA	105	3.07299	1	0
	Gleditsia aquatica	ENA	91	3.3782	1	0.252546
	Halesia diptera	ENA	141	3.29288	3	0.705589
	Halesia tetraptera	ENA	132	3.57149	7	0.867669
	Hamamelis ovalis	ENA	140	3.266	1	0
	Hamamelis vernalis	ENA	117	3.31477	4	0.858308
	Hamamelis virginiana	ENA	123	3.3832	4	0.688014
	Lindera benzoin	ENA	135	3.92884	1	0.212171
	Liriodendron tulipifera	ENA	104	2.71321	1	0.015623
	Magnolia tripetala	ENA	108	3.03878	1	0.230062
	Menispermum canadense	ENA	71	2.75277	2	0.474458
	Nyssa sylvatica	ENA	86	2.54606	6	1.46155
	Pieris floribunda	ENA	181	4.37105	11	1.82664
	Sassafras albidum	ENA	107	3.64816	3	0.655289
	Torreya taxifolia	ENA	99	1.93817	15	1.99184
Cornus			Fungal endophytes		Bacterial endophytes
	Species name		Observed ASVs	Shannon	Observed ASVs	Shannon
	Cornus alba	Swida	98.5	2.64452	6.5	1.03907
	Cornus alternifolia	Swida	142.333	3.29989	11	1.71055
	Cornus amomum	Swida	132.667	3.38944	5.66667	1.08647
	Cornus australis	Swida	NA	NA	0	0
	Cornus bretschneideri	Swida	87.5	2.34061	2	0.392493
	Cornus controversa	Swida	199.5	4.32974	22.5	2.32573
	Cornus coreana	Swida	120.5	3.02514	23	1.59693
	Cornus drummondii	Swida	82.3333	2.42246	20.3333	2.08377
	Cornus florida	Benthamidia	115	2.44527	2.33333	0.63474
	Cornus foemina	Swida	151	3.62178	19.5	1.62161
	Cornus glabrata	Swida	158	3.50408	30	2.64703
	Cornus hemsleyi	Swida	99.6667	2.21976	23.6667	1.94053
	Cornus kousa	Benthamidia	165.333	3.52315	5.66667	1.46551
	Cornus macrophylla	Swida	199.5	3.55898	5	1.29725
	Cornus mas	Macrocarpium	50.5	1.86324	9.33333	1.78961
	Cornus obliqua	Swida	132.5	3.1108	6.66667	1.32762
	Cornus officinalis	Macrocarpium	164	3.32755	20	2.54393
	Cornus pumila	Swida	128.5	3.11893	9.5	1.66345
	Cornus quinquenervis	Swida	122	3.21116	2	0.529706
	Cornus racemosa	Swida	130	3.4005	6.66667	1.68404
	Cornus sanguinea	Swida	130.333	2.55261	14.3333	1.54166
	Cornus sericea	Swida	185.667	3.7329	15.3333	2.09337
	Cornus walteri	Swida	102.667	2.53725	5.33333	1.22292
Sampling locations	Labels (species name_location)		Fungal endophytes		Bacterial endophytes
			Observed ASVs	Shannon	Observed ASVs	Shannon
	Calycanthus chinensis_Boston		143.667	3.42109	0	0
	Calycanthus chinensis_Raleigh		135.5	3.06054	1.5	0.299135
	Calycanthus floridus_Boston		169	3.2828	1	0.193305
	Calycanthus floridus_Raleigh		167	3.40165	1	0.318257
	Campsis radicans_Boston		38	2.39931	0	0
	Campsis radicans_Raleigh		117.667	3.1696	0	0
	Cornus controversa_Boston		204	4.33467	22.5	2.32573
	Cornus controversa_China		143.667	3.42835	78.3333	3.6753
	Cornus walteri_Boston		103.333	2.54531	5.33333	1.22292
	Cornus walteri_China		116	3.48381	36	3.20032
	Gleditsia japonica_Boston		119.333	3.17587	9.33333	1.47443
	Gleditsia japonica_Raleigh		124	3.58645	24	2.8148
	Halesia diptera_Boston		182.5	3.33401	1.5	0.281168
	Halesia diptera_Raleigh		120	3.17247	1	0.287432
	Hamamelis mollis_Boston		134	3.211	7.33333	1.48185
	Hamamelis mollis_Raleigh		196	3.5718	9	1.31293
	Hamamelis vernalis_Boston		130	3.34947	3.5	0.858308
	Hamamelis vernalis_Raleigh		112	3.43856	23	2.90813
	Hamamelis virginiana_Boston		140.667	3.36795	4	0.688014
	Hamamelis virginiana_Raleigh		124.5	3.38623	17	2.40778
	Liriodendron chinense_Boston		123.333	3.05113	0	0
	Liriodendron chinense_China		121.333	3.41383	3.66667	0.854734
	Liriodendron chinense_Raleigh		249	4.3025	1.5	0.339597
	Liriodendron tulipifera_Boston		124.333	2.73638	0.666667	0.015623
	Liriodendron tulipifera_China		145.667	3.44284	7.33333	0.770253
	Liriodendron tulipifera_Raleigh		185	4.28192	17	1.66946
	Sassafras albidum_Boston		158	3.02015	0	0
	Sassafras albidum_Raleigh		105	3.21973	1	0
	Sassafras tzumu_Boston		133	3.7075	0	0
	Sassafras tzumu_Raleigh		135.5	3.87892	1	0.233
