# Supplementary material for: Foliar endophyte diversity in Eastern Asian-Eastern North American disjunct tree species – influences of host identity, environment, phylogeny, and geographic isolation
Source: Front Plant Sci. 2023 Dec 13;14:1274746. doi: 10.3389/fpls.2023.1274746 (PMC10773735; doi:10.3389/fpls.2023.1274746)
Supplement: Supplementary file 5 [file Table_4.xlsx]

## Sheet: Sheet1
Table S4. Shared microbes in disjunct genera and Cornus. Fungi species shared by >= 25 species and bacteria species shared shared by >= 10 species of disjunct genera studied. Fungi species shared in >= 18 Cornus and bacteria species shared in >= 15 Cornus species. Information was extracted from data in rarefaction Table in Dryad. The OTUs are the ASVs.
Comparison	Taxa
Disjunct pairs	OTU0002: Fungi_Ascomycota_Dothideomycetes_Dothideales_Aureobasidiaceae
	OTU0007: Fungi_Ascomycota_Dothideomycetes_Capnodiales_Cladosporiaceae_Cladosporium_Cladosporium_tenuissimum
	OTU0004: Fungi_Ascomycota_Dothideomycetes_Capnodiales_Mycosphaerellaceae_Ramularia_Ramularia_vizellae
	OTU0011: Fungi_Ascomycota_Dothideomycetes_Capnodiales_Cladosporiaceae_Cladosporium_Cladosporium_sphaerospermum
	OTU0001: Fungi_Ascomycota_Sordariomycetes_Glomerellales_Glomerellaceae
	OTU0005: Fungi_Ascomycota_Dothideomycetes_Pleosporales_Didymellaceae_Nothophoma_Nothophoma_variabilis
	OTU0014: Fungi_Basidiomycota_Tremellomycetes_Filobasidiales_Filobasidiaceae_Filobasidium_Filobasidium_wieringae
	OTU0012: Fungi_Ascomycota_Dothideomycetes_Capnodiales_Mycosphaerellaceae_Ramularia_Ramularia_pratensis
	OTU0042: Fungi_Ascomycota_Taphrinomycetes_Taphrinales_Taphrinaceae_Taphrina_Taphrina_inositophila
	OTU0050: Fungi_Ascomycota_Eurotiomycetes_Chaetothyriales_Trichomeriaceae_Trichomerium_Trichomerium_dioscoreae
	OTU0018: Fungi_Ascomycota_Leotiomycetes_Thelebolales_Pseudeurotiaceae
	OTU0003: Fungi_Ascomycota_Dothideomycetes_Pleosporales_Pleosporaceae_Alternaria_Alternaria_alternata
	OTU0013: Fungi
	OTU0010: Fungi
	OTU0131: Fungi_Basidiomycota_Malasseziomycetes_Malasseziales_Malasseziaceae_Malassezia_Malassezia_restricta
	OTU0015: Fungi_Ascomycota_Dothideomycetes_Pleosporales_Didymellaceae
	OTU0016: Fungi_Ascomycota_Dothideomycetes_Pleosporales
	OTU0068: Fungi
	OTU0063: Fungi_Ascomycota_Dothideomycetes_Pleosporales_Didymosphaeriaceae_Pseudopithomyces_Pseudopithomyces_chartarum
	OTU0127: Fungi_Ascomycota_Dothideomycetes_Capnodiales_Mycosphaerellaceae_Mycosphaerella_Mycosphaerella_tassiana
	OTU0006: Fungi_Olpidiomycota_GS18_GS18
	OTU0017: Fungi
	OTU0038: Fungi_Ascomycota_Dothideomycetes_Pleosporales_Didymellaceae_Epicoccum_Epicoccum_nigrum
	OTU0057: Fungi_Basidiomycota_Tremellomycetes_Tremellales_Rhynchogastremataceae_Papiliotrema_Papiliotrema_wisconsinensis
	OTU0045: Fungi_Basidiomycota
	OTU0073: Fungi_Ascomycota_Eurotiomycetes_Chaetothyriales_Trichomeriaceae_Trichomerium_Trichomerium_foliicola
	OTU0118: Fungi_Basidiomycota_Tremellomycetes_Filobasidiales_Filobasidiaceae_Filobasidium
	OTU0238: Fungi_Basidiomycota_Tremellomycetes_Tremellales_Bulleraceae_Genolevuria
	OTU0023: Fungi
	OTU0109: Fungi_Ascomycota_Taphrinomycetes_Taphrinales_Taphrinaceae_Taphrina_Taphrina_inositophila
	OTU0034: Bacteria_Proteobacteria_Gammaproteobacteria_Enterobacteriales_Enterobacteriaceae
	OTU0041: Bacteria_Proteobacteria_Alphaproteobacteria_Rhizobiales_Methylocystaceae
Cornus	OTU0040: Bacteria_Bacteroidetes_Bacteroidia_Bacteroidales_Bacteroidaceae_Bacteroides
	OTU0067: Bacteria_Firmicutes_Bacilli_Bacillales_Paenibacillaceae_Paenibacillus
	OTU0060: Bacteria_Firmicutes_Clostridia_Clostridiales_Clostridiaceae_Clostridium
	OTU0037: Bacteria_Proteobacteria_Betaproteobacteria_Burkholderiales_Oxalobacteraceae_Janthinobacterium_lividum
	OTU0034: Bacteria_Proteobacteria_Gammaproteobacteria_Enterobacteriales_Enterobacteriaceae
	OTU0011: Fungi_Ascomycota_Dothideomycetes_Capnodiales_Cladosporiaceae_Cladosporium_Cladosporium_sphaerospermum
	OTU0007: Fungi_Ascomycota_Dothideomycetes_Capnodiales_Cladosporiaceae_Cladosporium_Cladosporium_tenuissimum
	OTU0012: Fungi_Ascomycota_Dothideomycetes_Capnodiales_Mycosphaerellaceae_Ramularia_Ramularia_pratensis
	OTU0004: Fungi_Ascomycota_Dothideomycetes_Capnodiales_Mycosphaerellaceae_Ramularia_Ramularia_vizellae
	OTU0110: Fungi_Ascomycota_Dothideomycetes_Capnodiales_Neodevriesiaceae_Neodevriesia_Neodevriesia_lagerstroemiae
	OTU0159: Fungi_Ascomycota_Dothideomycetes_Capnodiales
	OTU0002: Fungi_Ascomycota_Dothideomycetes_Dothideales_Aureobasidiaceae
	OTU0005: Fungi_Ascomycota_Dothideomycetes_Pleosporales_Didymellaceae_Nothophoma_Nothophoma_variabilis
	OTU0003: Fungi_Ascomycota_Dothideomycetes_Pleosporales_Pleosporaceae_Alternaria_Alternaria_alternata
	OTU0050: Fungi_Ascomycota_Eurotiomycetes_Chaetothyriales_Trichomeriaceae_Trichomerium_Trichomerium_dioscoreae
	OTU0018: Fungi_Ascomycota_Leotiomycetes_Thelebolales_Pseudeurotiaceae
	OTU0001: Fungi_Ascomycota_Sordariomycetes_Glomerellales_Glomerellaceae
	OTU0024: Fungi_Ascomycota_Sordariomycetes_Hypocreales_Cordycipitaceae_Parengyodontium_Parengyodontium_album
	OTU0041: Fungi_Ascomycota_Taphrinomycetes_Taphrinales_Taphrinaceae_Taphrina
	OTU0042: Fungi_Ascomycota_Taphrinomycetes_Taphrinales_Taphrinaceae_Taphrina_Taphrina_inositophila
	OTU0261: Fungi_Basidiomycota_Agaricomycetes_Polyporales_Polyporaceae_Trametes_Trametes_versicolor
	OTU0131: Fungi_Basidiomycota_Malasseziomycetes_Malasseziales_Malasseziaceae_Malassezia_Malassezia_restricta
	OTU0014: Fungi_Basidiomycota_Tremellomycetes_Filobasidiales_Filobasidiaceae_Filobasidium_Filobasidium_wieringae
	OTU0057: Fungi_Basidiomycota_Tremellomycetes_Tremellales_Rhynchogastremataceae_Papiliotrema_Papiliotrema_wisconsinensis
	OTU0006: Fungi_Olpidiomycota_GS18_GS18
	OTU0017: Fungi
