# Supplementary material for: Foliar endophyte diversity in Eastern Asian-Eastern North American disjunct tree species – influences of host identity, environment, phylogeny, and geographic isolation
Source: Front Plant Sci. 2023 Dec 13;14:1274746. doi: 10.3389/fpls.2023.1274746 (PMC10773735; doi:10.3389/fpls.2023.1274746)
Supplement: Supplementary file 6 [file Table_5.xlsx]

## Sheet: Sheet1
Table S5 ANOSIM test of beta diversity of endophytes between each disjunct species from EA and ENA. EA means eastern Aisa, ENA means eastern North America. P < 0.1, which means marginal significant.
EA	ENA	Sample size	Permutations	r	p-value
Acer carpinifolium	Acer spicatum	6	999	0.37037	0.117
Calycanthus chinensis	Calycanthus floridus	6	999	0.462963	0.102
Campsis grandiflora	Campsis radicans	4	999	-0.555556	1
Castanea mollissima	Castanea dentata	6	999	0.462963	0.183
Cornus controversa	Cornus alternifolia	5	999	0.916667	0.09*
Decumaria sinensis	Decumaria barbara	4	999	1	0.333
Gleditsia japonica	Gleditsia aquatica	6	999	0.259259	0.113
Halesia EA	Halesia ENA	7	999	0.066667	0.42
Hamamelis EA	Hamamelis ENA	13	999	-0.027632	0.586
Lindera obtusiloba	Lindera benzoin	6	999	0.259259	0.401
Liriodendron chinense	Liriodendron tulipifera	6	999	0.37037	0.087*
Magnolia officinalis	Magnolia tripetala	6	999	0.388889	0.198
Nyssa sinensis	Nyssa sylvatica	4	999	0.111111	0.744
Pieris japonica	Pieris floribunda	6	999	0.703704	0.106
Sassafras albidum	Sassafras tzumu	4	999	-0.111111	0.737
Torreya nucifera	Torreya taxifolia	4	999	1	0.334
