# Supplementary material for: Foliar endophyte diversity in Eastern Asian-Eastern North American disjunct tree species – influences of host identity, environment, phylogeny, and geographic isolation
Source: Frontiers journal article supplement (doi:10.3389/fpls.2023.1274746), 2023-12-13
Supplement: Table_3.xls [file Table_3.xls]

## Sheet: Sheet1
Table S3 The number of amplicon sequence variants (ASVs) of endophytes differntially abundant in host plants at the generic level and within Cornus identified by Indicspecies analysis at the corrected P values of 0.05. Raw results from the analysis is available at Dryad: (https://doi.org/10.5061/dryad.s7h44j1cf).
Comparison	Host plant	No. of differential abundant ASVs
Disjunct pairs	Torreya	93
	Sassafras	101
	Pieris	216
	Nyssa	61
	Menispermum	47
	Magnolia	10
	Liriodendron	71
	Lindera	30
	Hamamelis	71
	Halesia	34
	Gleditsia	15
	Decumaria	15
	Cornus	103
	Castanea	18
	Campsis	107
	Calycanthus	145
	Acer	141
	EA	6
	ENA	7
	Total ASVs	3247
Cornus	Cornus alba	84
	Cornus alternifolia	139
	Cornus amomum	109
	Cornus australis	34
	Cornus bretschneideri	52
	Cornus controversa	170
	Cornus coreana	59
	Cornus drummondii	55
	Cornus florida	58
	Cornus foemina	72
	Cornus glabrata	83
	Cornus hemsleyi	75
	Cornus kousa	126
	Cornus macrophylla	127
	Cornus mas	36
	Cornus obliqua	91
	Cornus officinalis	108
	Cornus pumila	89
	Cornus quinquenervis	57
	Cornus racemosa	97
	Cornus sanguinea	65
	Cornus sericea	155
	Cornus walteri	74
	Total ASVs	2212
